# Supplementary material
Source: ML conference proceedings conference paper supplement (https://proceedings.neurips.cc/paper_files/paper/2019/hash/8dd291cbea8f231982db0fb1716dfc55-Abstract.html)
Supplement: Supplementary file [file 8dd291cbea8f231982db0fb1716dfc55-Supplemental.zip]

---

# Supplementary file - Decentralized sketching of low-rank matrices

---

## 1 Proof of Lemma 1

Let  $(\mathbf{U}, \mathbf{V})$  be a minimizer to (4). Then by the feasibility it satisfies  $\mathbf{X} = \mathbf{U}\mathbf{V}^\top$ . Therefore

$$\begin{aligned}\|\mathbf{X}\|_{1 \rightarrow 2} &= \|\mathbf{U}\mathbf{V}^\top\|_{1 \rightarrow 2} \\ &= \max_i \|\mathbf{U}\mathbf{V}^\top \mathbf{e}_i\|_2 \leq \max_i \|\mathbf{U}\| \|\mathbf{V}^\top \mathbf{e}_i\|_2 \\ &\leq \max_i \|\mathbf{U}\|_F \|\mathbf{V}^\top \mathbf{e}_i\|_2 \\ &= \|\mathbf{U}\|_F \|\mathbf{V}\|_{2, \infty} = \|\mathbf{X}\|_{\text{mixed}}.\end{aligned}$$

Suppose that  $(\mathbf{U}, \mathbf{V})$  satisfies  $\mathbf{M} = \mathbf{U}\mathbf{V}^\top$  and  $\mathbf{U}^\top \mathbf{U} = I_r$ . Such  $(\mathbf{U}, \mathbf{V})$  always exists. For example, think about the SVD of  $\mathbf{M}$ . Since  $(\mathbf{U}, \mathbf{V})$  is feasible to (3), it follows that

$$\|\mathbf{X}\|_{\text{mixed}} \leq \|\mathbf{U}\|_F \|\mathbf{V}^\top\|_{1 \rightarrow 2} \leq \sqrt{r} \|\mathbf{U}\| \|\mathbf{V}^\top\|_{1 \rightarrow 2} = \sqrt{r} \|\mathbf{V}^\top\|_{1 \rightarrow 2}.$$

On the other hand,

$$\|\mathbf{X}\|_{1 \rightarrow 2} = \max_i \|\mathbf{U}\mathbf{V}^\top \mathbf{e}_i\|_2 = \max_i \|\mathbf{V}^\top \mathbf{e}_i\|_2 = \|\mathbf{V}^\top\|_{1 \rightarrow 2}.$$

We have shown

$$\|\mathbf{X}\|_{\text{mixed}} \leq \sqrt{r} \|\mathbf{X}\|_{1 \rightarrow 2}.$$

In summary, we have

$$\|\mathbf{X}\|_{1 \rightarrow 2} \leq \|\mathbf{X}\|_{\text{mixed}} \leq \sqrt{r} \|\mathbf{X}\|_{1 \rightarrow 2}.$$

That is, the pair of  $\|\cdot\|_{\text{mixed}}$  and  $\|\cdot\|_{1 \rightarrow 2}$  can be also used for a surrogate of the rank of a matrix.

## 2 Proof of Lemma 2

We derive a tail estimate on  $\sup_{\mathbf{M}} \|\mathbf{Q}_\mathbf{M} \xi\|_2^2$  by using the results on suprema of chaos processes [1] summarized in the following theorem.

**Theorem 1 (Theorem 3.1 in [1])** *Let  $\xi \in \mathbb{R}^n$  be a Gaussian vector with  $\mathbb{E}[\xi] = 0$  and  $\mathbb{E}[\xi \xi^\top] = I_n$ ,  $\Delta \subset \mathbb{R}^{m \times n}$ , and  $0 < \zeta < 1$ . There exists a numerical constant  $C$  such that*

$$\begin{aligned}\sup_{\mathbf{Q} \in \Delta} |\|\mathbf{Q}\xi\|_2^2 - \mathbb{E}[\|\mathbf{Q}\xi\|_2^2]| \\ \leq C \left( E + V \sqrt{\log(2\zeta^{-1})} + U \log(2\zeta^{-1}) \right)\end{aligned}$$

*holds with probability  $1 - \zeta$ , where*

$$\begin{aligned}E &:= \gamma_2(\Delta, \|\cdot\|) [\gamma_2(\Delta, \|\cdot\|) + d_F(\Delta)], \\ V &:= d_S(\Delta) [\gamma_2(\Delta, \|\cdot\|) + d_F(\Delta)], \\ U &:= d_S^2(\Delta).\end{aligned}$$

We apply Theorem 1 to the set  $\Delta = \{\mathbf{Q}_M : M \in \kappa(\alpha, R)\}$ . The radii of  $\Delta$  with respect to the Frobenius norm and to the spectral norm are respectively upper-bounded as follows:

$$d_F(\Delta) \leq \alpha \sqrt{d_2}$$

and

$$d_S(\Delta) \leq \frac{\alpha}{\sqrt{L}}.$$

Let  $B_S$  denote the unit ball with respect to the spectral norm. Then the  $\gamma_2$ -functional of  $\Delta$  with respect to the spectral norm is upper-bounded through Dudley's inequality by

$$\begin{aligned} \gamma_2(\Delta, \|\cdot\|_2) &\leq c \int_0^\infty \sqrt{\log N(\Delta, \eta B_S)} d\eta \\ &\leq \frac{c}{\sqrt{L}} \int_0^\infty \sqrt{\log N(\kappa(\alpha, R), \eta B_{1 \rightarrow 2})} d\eta \\ &\leq \frac{c' R \sqrt{d} \log^{3/2} d}{\sqrt{L}}, \end{aligned}$$

where the last inequality follows from Lemma 4.

Then  $E$ ,  $U$ , and  $V$  in Theorem 1 are upper-bounded by

$$\begin{aligned} E &\leq \alpha R \sqrt{\frac{(d_1 + d_2)d_2}{L}} \log^{3/2} d \\ &\quad + \frac{R^2}{L} d \log^3 d \\ U &\leq \frac{\alpha^2}{L} \\ V &\leq \frac{\alpha \sqrt{d_2}}{\sqrt{L}} \left( \frac{R \sqrt{d}}{L d_2} \log^{3/2} d + \alpha \right). \end{aligned}$$

By plugging in these upper estimates to Theorem 1, we obtain

$$\begin{aligned} &\sum_{M \in \kappa(\alpha, R)} \left| \frac{\|\mathbf{Q}_M \xi\|^2}{d_2} - \frac{\|\mathbf{M}\|_F^2}{d_2} \right| \\ &\leq c \left( \frac{\alpha R \sqrt{d} \log^{3/2} d}{\sqrt{L} d_2} + \frac{R^2 d \log^3 d}{L d_2} \right) + t \\ &\leq \frac{c R \sqrt{d}}{\sqrt{L} d_2} \left( \alpha \log^{3/2} d + \frac{R \sqrt{d} \log^3 d}{\sqrt{L} d_2} \right) + t \end{aligned}$$

with probability at least  $1 - 2 \exp(-\hat{c} \min(t^2/V^2, t/U))$ .

We take  $t = \alpha R \sqrt{d} \log^{3/2} d / L d_2$  not to increase the upper bound in order. This leads to the Lemma 2.

### 3 Upper bound on $T_1$ and $T_2$

A tail bound for  $T_1$  can be derived by the following lemma [2], which is a direct consequence of the moment version of Dudley's inequality (e.g., p. 263 in [3]) and a version of Markov's inequality (e.g., Proposition 7.11 in [3]).

**Lemma 1** *Let  $\mu \in \mathbb{C}^n$  be a standard complex Gaussian vector with  $E \mu \mu^* = I_n$ , and let  $\Delta \subset \mathbb{C}^n$ ,  $0 < \zeta < e^{1/2}$ . Then, there exists constant  $c$  such that*

$$\sup_{f \in \Delta} |f^* \mu| \leq c \sqrt{\log(\zeta^{-1})} \int_0^\infty \sqrt{\log N(\Delta, \|\cdot\|_2, t)} dt$$

with probability  $1 - \zeta$ .

We apply Lemma 1 to the maximum of linear forms of a Gaussian vector  $\mu = [\mathbf{b}_{1,1}^\top \cdots \mathbf{b}_{L,d_2}^\top]^\top$  over the set  $\mathcal{F} = \{f_{\mathbf{M}} : \mathbf{M} \in \kappa(\alpha, R)\}$ , where  $f_{\mathbf{M}}$  is defined by

$$f_{\mathbf{M}} := [\mathbf{1}_{1,L} \otimes (\mathbf{M}\mathbf{e}_1)^\top \quad \cdots \quad \mathbf{1}_{1,L} \otimes (\mathbf{M}\mathbf{e}_{d_2})^\top]^\top.$$

Here  $\mathbf{1}_{1,L}$  is the row vector of length  $L$  with all entries set to 1. Then we have

$$\begin{aligned} \|f_{\mathbf{M}} - f_{\mathbf{M}'}\|_2 &= \|\mathbf{M} - \mathbf{M}'\|_F \sqrt{L} \\ &\leq \|\mathbf{M} - \mathbf{M}'\|_{1 \rightarrow 2} \sqrt{Ld_2}. \end{aligned}$$

Hence,

$$N(\mathcal{F}, \eta B_2) \leq N\left(\kappa(\alpha, R), \frac{\eta}{\sqrt{d_2}} B_\epsilon\right).$$

Combining these quantities and the entropy estimate for  $N(\kappa(\alpha, R), \frac{\eta}{\sqrt{d_2}} B_\epsilon)$  with the above lemma, we get

$$\sup_{\mathbf{M} \in \kappa(\alpha, R)} \left| \sum_{l,i} \langle \mathbf{b}_{l,i}, \mathbf{M}\mathbf{e}_i \rangle \right| \leq c \log^{1/2} d \sqrt{L} R \sqrt{d}.$$

Using this, we get

$$T_1 = \mathbb{E} \left\| \sum_{l,i} \nu_{l,i} \mathbf{A}_{l,i} \right\|_* \leq c\sigma \sqrt{d_2} R \sqrt{d} \log^{3/2} d$$

with probability at least  $1 - 2 \exp(-cd)$

Using Lemma 2, we have

$$T_2 \leq \alpha \sqrt{d_2 \left( \frac{cR}{\alpha} \sqrt{\frac{d+d_2}{Ld_2}} + 1 \right) \log^3 d}$$

Note that  $T_1$  dominates  $T_2$  when  $Ld_2 < d_1 d_2$ . In this case, we conclude that

$$\frac{\left\| \sum_{l,i} \nu_{l,i} \mathbf{A}_{l,i} \right\|_*}{d_2} \leq c\sigma \sqrt{L} R \sqrt{\frac{d}{Ld_2}} \log^3 d.$$

## 4 Details of the ADMM based algorithm

We now give closed form solutions to each of the update step in Algorithm 1.

### 4.0.1 Update for $\mathbf{T}$

$$\begin{aligned} \mathbf{T}^{k+1} &= \arg \min_{\mathbf{T}} L(\mathbf{X}, \mathbf{W}^k, \mathbf{Z}^k) \\ &= \arg \min_{\mathbf{T} \succeq \mathbf{0}} \lambda_1 \langle [\mathbf{I} \ 0], \mathbf{T} \rangle + \langle \mathbf{Z}, \mathbf{T} - \mathbf{W} \rangle + \frac{\rho}{2} \|\mathbf{T} - \mathbf{W}\|_F^2 \\ &= \pi_{\mathcal{S}_+^d}(\mathbf{W}^k - \rho^{-1}(\mathbf{Z}^k + \lambda_1 [\mathbf{I} \ 0])) \end{aligned}$$

where  $\pi$  denotes the projection operator and  $\mathcal{S}_+^d$  is the set of PSD matrices of size  $d$ .

### 4.0.2 Update for $\mathbf{W}$

$$\mathbf{W}^{k+1} = \arg \min_{\mathbf{W}} L(\mathbf{T}^{k+1}, \mathbf{W}, \mathbf{Z}^k)$$

This optimization can be separate into four sub-problems. Let  $\mathbf{C} = \mathbf{T}^{k+1} + \rho^{-1} \mathbf{Z}^k$ . Let  $\widetilde{\mathbf{M}}$  be the matrix obtained by setting the diagonal elements of any matrix  $\mathbf{M}$  to 0 and let  $q = \text{diag}(\mathbf{C}_{22})$ . The four sub-problems are

1.  $\mathbf{W}_{12}^{k+1} = \arg \min_{\|\mathbf{W}_{12}\|_{1 \rightarrow 2} \leq \alpha} f(\mathbf{W}_{12}) + \langle \mathbf{Z}_{12}^k, \mathbf{T}_{12}^{k+1} - \mathbf{W}_{12} \rangle + \frac{\rho}{2} \|\mathbf{X}_{12}^{k+1} - \mathbf{W}_{12}\|_F^2$  where  
 $f(\mathbf{W}_{12}) = \sum_{l,i} |y_{l,i} - \langle A_{l,i}, \mathbf{W}_{12} \rangle|^2$
2.  $\mathbf{W}_{11}^{k+1} = \arg \min_{\mathbf{W}_{11}} \|\mathbf{W}_{11} - \mathbf{C}_{11}\|_F^2$
3.  $\widetilde{\mathbf{W}}_{22}^{k+1} = \arg \min_{\widetilde{\mathbf{W}}_{22}} \|\widetilde{\mathbf{W}}_{22} - \widetilde{\mathbf{C}}_{22}\|_F^2$
4.  $\text{diag}(\mathbf{W}_{22}^{k+1}) = \arg \min_{u \in \mathbb{R}^{d_2}} \lambda_2 \|u\|_\infty + \frac{\rho}{2} \|u - q\|_2^2$

Sub-problem 1 is a least-squares problem which has a closed form solution. Sub-problems 2 and 3 are readily solved by setting  $\mathbf{W}_{11}^{k+1} = \mathbf{C}_{11}$  and  $\widetilde{\mathbf{W}}_{22}^{k+1} = \widetilde{\mathbf{C}}_{22}$ . Sub-problem 4 has a closed form solution as described in [4].

## 5 Entropy Estimates of Tensor Products

For symmetric convex bodies  $D$  and  $E$ , the *covering number*  $N(D, E)$  and the *packing number*  $M(D, E)$  are respectively defined by

$$N(D, E) := \min \left\{ l \mid \exists y_1, \dots, y_l \in D, D \subset \bigcup_{1 \leq j \leq l} (y_j + E) \right\},$$

$$M(D, E) := \max \left\{ l \mid \exists y_1, \dots, y_l \in D, y_j - y_k \notin E, \forall j \neq k \right\}.$$

Let  $X, Y$  be Banach spaces. For  $T \in L(X, Y)$ , the *dyadic entropy number* [5] is defined by

$$e_k(T) := \inf \{ \epsilon > 0 \mid M(T(B_X), \epsilon B_Y) \leq 2^{k-1} \}.$$

where  $B_X$  and  $B_Y$  denote unit balls. We will use the following shorthand notation for the weighted summation of the dyadic entropy numbers:

$$\mathcal{E}_{2,1}(T) := \sum_{k=1}^{\infty} k^{-1/2} e_k(T),$$

which is up to a constant equivalent to the entropy integral  $\int_0^\infty \sqrt{\ln N(T(B_X), \epsilon B_Y)} d\epsilon$  [6], which plays a key role in analyzing properties on random linear operators on low-rank matrices.

In this section, we derive the  $\mathcal{E}_{2,1}$  of the identity operator from the injective tensor product to the projective tensor product of a set of Banach space pairs. Note that these tensor product spaces are valid Banach spaces too. The main machinery in deriving these estimates is Maurey's empirical method [7], summarized in the following lemma.

**Lemma 2** *Let  $T \in \ell_\infty^{d_2} \otimes \ell_\infty^{d_1}$ . Then*

$$\mathcal{E}_{2,1}(T) \leq C \sqrt{1 + \ln(d_1 \vee d_2)} (1 + \ln(d_1 \wedge d_2))^{3/2} \|T\|_\vee.$$

To apply Lemma 2 to  $\ell_\infty^{d_2} \otimes \ell_p^{d_1}$  with  $2 \leq p < \infty$ , we need the following result that shows embedding of finite dimensional  $\ell_p$  space to  $\ell_1$  up to a small Banach-Mazur distance.

**Lemma 3 ([7, Lemma 5])** *Let  $1 < p \leq 2$  and  $\epsilon > 0$ . There is a constant  $c(p, \epsilon) > 0$  for which the following property holds: For each  $d_1$ , there exists  $k \geq c(p, \epsilon) d_1$  so that  $\ell_1^{d_1}$  contains a subspace  $(1 + \epsilon)$ -isomorphic to  $\ell_p^k$ , i.e., the Banach-Mazur distance is upper-bounded by  $(1 + \epsilon)$ .*

Then we obtain the following entropy estimate for  $\ell_\infty^{d_2} \otimes \ell_p^{d_1}$  with  $2 \leq p < \infty$  by combining Lemmas 2 and 3.

Let  $2 \leq p < \infty$ . Then

$$\mathcal{E}_{2,1}(\text{id} : \ell_\infty^{d_2} \widehat{\otimes} \ell_p^{d_1} \rightarrow \ell_\infty^{d_2} \otimes \ell_p^{d_1}) \leq C \sqrt{d_1 + d_2} (1 + \ln(d_1 d_2))^{3/2}.$$

Note that Lemma 4 in the main paper is a particular case of Lemma 3 above.

## References

- [1] F. Krahmer, S. Mendelson, and H. Rauhut. Suprema of chaos processes and the restricted isometry property. *Communications on Pure and Applied Mathematics*, 67(11):1877–1904, 2014.
- [2] K. Lee, F. Krahmer, and J. Romberg. Spectral methods for passive imaging: Nonasymptotic performance and robustness. *SIAM Journal on Imaging Sciences*, 11(3):2110–2164, 2018.
- [3] S. Foucart and H. Rauhut. *A mathematical introduction to compressive sensing*, volume 1. Birkhäuser Basel, 2013.
- [4] E. X. Fang, H. Liu, K. Toh, and W. Zhou. Max-norm optimization for robust matrix recovery. *Mathematical Programming*, 167(1):5–35, 2018.
- [5] B. Carl and I. Stephani. *Entropy, Compactness and the Approximation of Operators*. Cambridge Tracts in Mathematics. Cambridge University Press, 1990.
- [6] G. Pisier. *The volume of convex bodies and Banach space geometry*, volume 94. Cambridge University Press, 1999.
- [7] B. Carl. Inequalities of Bernstein-Jackson-type and the degree of compactness of operators in Banach spaces. *Ann. Inst. Fourier (Grenoble)*, 35(3):79–118, 1985.
